# Supplementary material
Source: PubMed Central journal article supplement (PMC6736913)
Supplement: HESR-54-994-s003.pdf [file HESR-54-994-s003.pdf]

**Appendix B: CAPTURE Falls  
Gap Analysis Scorecard**

Hospital Name: \_\_\_\_\_

Date: \_\_\_\_\_

Instructions: Please complete the following questionnaire with members of your current or newly formed Fall Risk Reduction Team.

**I. Interprofessional Fall Risk Reduction Team Members**

List the name, credentials, and job title of individuals that participated in your hospital's fall risk reduction team as part of the CAPTURE Falls project.

| <b>Name</b> | <b>Credentials</b> | <b>Job Title</b> |
|-------------|--------------------|------------------|
| _____       | _____              | _____            |
| _____       | _____              | _____            |
| _____       | _____              | _____            |
| _____       | _____              | _____            |
| _____       | _____              | _____            |
| _____       | _____              | _____            |
| _____       | _____              | _____            |
| _____       | _____              | _____            |
| _____       | _____              | _____            |

**II. Fall Risk Assessment and Tools**

Please state the tool you currently use to assess fall risk on admission.

Fall Risk Assessment Tool: \_\_\_\_\_

Implementation date: \_\_\_\_\_

**III. Fall Risk Reduction Coordination Processes**

Maximum Score = 84

Please indicate whether or not each of the activities listed is performed in your hospital by placing a checkmark in the first column. **If the activity is currently being performed**, estimate your Fall Risk Reduction team’s effectiveness (from Not Effective to Very Effective) for each activity by placing a checkmark in the appropriate column.

| Fall Risk Reduction Organizational Activities                                                                                | Activity Performed       |                          | Effectiveness            |                          |                          |                          |
|------------------------------------------------------------------------------------------------------------------------------|--------------------------|--------------------------|--------------------------|--------------------------|--------------------------|--------------------------|
|                                                                                                                              | No                       | Yes                      | Not Effective            | Somewhat Effective       | Effective                | Very Effective           |
| Create policies and procedures regarding fall risk reduction                                                                 | <input type="checkbox"/> |
| Select interventions to reduce risk of falls                                                                                 | <input type="checkbox"/> |
| Select fall risk assessment tool(s)                                                                                          | <input type="checkbox"/> |
| Link targeted interventions to identified risk factors to reduce the risk of falls                                           | <input type="checkbox"/> |
| Conduct audits to monitor adherence to fall risk reduction interventions                                                     | <input type="checkbox"/> |
| Communicate results of audits to staff                                                                                       | <input type="checkbox"/> |
| Select/Develop/Revise Fall Reporting Form                                                                                    | <input type="checkbox"/> |
| Collect data regarding fall risk reduction program outcomes                                                                  | <input type="checkbox"/> |
| Analyze data regarding fall risk reduction program outcomes                                                                  | <input type="checkbox"/> |
| Modify fall risk reduction policies and procedures based on outcome data                                                     | <input type="checkbox"/> |
| Conduct or participate in individual root cause analysis of injurious falls                                                  | <input type="checkbox"/> |
| Conduct or participate in aggregate root cause analysis of multiple falls                                                    | <input type="checkbox"/> |
| Educate staff about fall risk reduction policies and procedures                                                              | <input type="checkbox"/> |
| Educate staff to use fall risk assessment tool                                                                               | <input type="checkbox"/> |
| Educate staff to implement targeted fall risk reduction interventions                                                        | <input type="checkbox"/> |
| Educate staff to report all falls (Unassisted & Assisted)                                                                    | <input type="checkbox"/> |
| Educate staff about outcomes of your fall risk reduction program                                                             | <input type="checkbox"/> |
| Communicate fall risk reduction program barriers and successes to senior leaders                                             | <input type="checkbox"/> |
| Share fall risk reduction program and outcomes with hospital board members                                                   | <input type="checkbox"/> |
| Integrate evidence from medicine, nursing, pharmacy, and rehabilitation therapies to continually improve fall risk reduction | <input type="checkbox"/> |
| Inform front-line staff about actions taken to improve systems as a result of reported falls                                 | <input type="checkbox"/> |

#### IV. Fall Risk Reduction Education/Training

Please consider each of the Fall Risk Reduction training topics below and check the appropriate response to each question/statement.

##### 1. Overall Fall Risk Reduction Program (Purpose, interventions, and outcomes)

Maximum score = 12

- a. Training conducted in past two years:  Yes  No
- b. Topic included in new employee orientation:  Yes  No
- c. Policy in place to sustain training:  Yes  No
- d. Staff required to attend training:  All Staff  All Clinical Staff  Nursing Staff only  
 Other: \_\_\_\_\_
- e. Training includes:  Opportunity to practice (i.e. simulation, role play, etc.)  
 Online modules  Demonstration (live or video)

##### 2. Administration of the fall risk assessment screening tool used by nursing

Maximum score = 15

- a. Training conducted in past two years:  Yes  No
- b. Topic included in new employee orientation:  Yes  No
- c. Policy in place to sustain training:  Yes  No
- d. Staff required to attend training:  All Clinical Staff  Nursing Staff only  
 Other: \_\_\_\_\_
- e. Training includes:  Competency component  Opportunity to practice (i.e. simulation, role play, etc.)  
 Online modules  Demonstration (live or video)

##### 3. Safe transfers and mobility

Maximum score = 15

- a. Training conducted in past two years:  Yes  No
- b. Topic included in new employee orientation:  Yes  No
- c. Policy in place to sustain training:  Yes  No
- d. Staff required to attend training:  All Clinical Staff  Nursing Staff only  
 Other: \_\_\_\_\_
- e. Training includes:  Competency component  Opportunity to practice (i.e. simulation, role play, etc.)  
 Online modules  Demonstration (live or video)

##### 4. Use of mechanical lifts

Maximum score = 15

- a. Training conducted in past two years:  Yes  No
- b. Topic included in new employee orientation:  Yes  No
- c. Policy in place to sustain training:  Yes  No
- d. Staff required to attend training:  All Clinical Staff  Nursing Staff only  
 Other: \_\_\_\_\_
- e. Training includes:  Competency component  Opportunity to practice (i.e. simulation, role play, etc.)  
 Online modules  Demonstration (live or video)

##### 5. Post-fall Huddles

Maximum score = 15

- a. Training conducted in past two years:  Yes  No
- b. Topic included in new employee orientation:  Yes  No
- c. Policy in place to sustain training:  Yes  No
- d. Staff required to attend training:  All Clinical Staff  Nursing Staff only  
 Other: \_\_\_\_\_
- e. Training includes:  Competency component  Opportunity to practice (i.e. simulation, role play, etc.)  
 Online modules  Demonstration (live or video)

## V. Fall Risk Reduction Processes

Please indicate whether or not each of the listed processes is used to reduce the risk of falls in your hospital by placing a checkmark in the appropriate column. **If the process is used**, estimate the frequency with which it is used by your hospital staff consistent with policy and procedures and place a checkmark in the appropriate column.

| Evidence-Based Bedside<br>Fall Risk Reduction Processes                                              | Process Used             |                          | Frequency Used           |                          |                          |                          |                          |
|------------------------------------------------------------------------------------------------------|--------------------------|--------------------------|--------------------------|--------------------------|--------------------------|--------------------------|--------------------------|
|                                                                                                      | No                       | Yes                      | Never                    | Rarely                   | Sometimes                | Frequently               | Always                   |
| <b>Universal</b> Maximum Score = 36                                                                  |                          |                          |                          |                          |                          |                          |                          |
| Call light within reach                                                                              | <input type="checkbox"/> |
| Declutter environment                                                                                | <input type="checkbox"/> |
| Handoff tool to communicate fall risk                                                                | <input type="checkbox"/> |
| <i>Purposeful</i> hourly rounding (assesses four Ps: position, pain, personal items in reach, potty) | <input type="checkbox"/> |
| Increased lighting                                                                                   | <input type="checkbox"/> |
| Low bed                                                                                              | <input type="checkbox"/> |
| Nonskid footwear                                                                                     | <input type="checkbox"/> |
| Patient/family education                                                                             | <input type="checkbox"/> |
| Top bed rails up                                                                                     | <input type="checkbox"/> |
| <b>Targeted</b> Maximum Score = 72                                                                   |                          |                          |                          |                          |                          |                          |                          |
| Alert sign indicating patient is at risk for falls                                                   | <input type="checkbox"/> |
| Assistive device for transfers/ambulation                                                            | <input type="checkbox"/> |
| Bed alarms (pads or built into bed)                                                                  | <input type="checkbox"/> |
| Pad Chair alarms                                                                                     | <input type="checkbox"/> |
| Tabs Alarms                                                                                          | <input type="checkbox"/> |
| Colored wrist band                                                                                   | <input type="checkbox"/> |
| Document fall risk in chart                                                                          | <input type="checkbox"/> |
| Elevated toilet seat                                                                                 | <input type="checkbox"/> |
| Gait/transfer belt                                                                                   | <input type="checkbox"/> |
| Hip protectors                                                                                       | <input type="checkbox"/> |
| Medication review by pharmacist before a fall                                                        | <input type="checkbox"/> |
| Occupational Therapy evaluation                                                                      | <input type="checkbox"/> |
| Physical Therapy evaluation                                                                          | <input type="checkbox"/> |
| Sitters                                                                                              | <input type="checkbox"/> |
| Supervised ambulation                                                                                | <input type="checkbox"/> |
| Supervised transfers                                                                                 | <input type="checkbox"/> |
| Supervised toileting                                                                                 | <input type="checkbox"/> |
| Toileting schedule                                                                                   | <input type="checkbox"/> |

**VI. Organizational Factors Impacting Fall Risk Reduction**

Maximum Score = 32

Please indicate whether or not each of the practices listed is performed in your hospital by placing a checkmark in the appropriate column. **If performed**, estimate the frequency with which each practice is performed consistent with policy and procedures and place a checkmark in the appropriate column.

| Evidence-Based<br>Organizational Level<br>Fall Risk Reduction Processes                                            | Activity Performed       |                          | Frequency Performed        |                            |                            |                            |                            |
|--------------------------------------------------------------------------------------------------------------------|--------------------------|--------------------------|----------------------------|----------------------------|----------------------------|----------------------------|----------------------------|
|                                                                                                                    | No                       | Yes                      | Never                      | Rarely                     | Sometimes                  | Frequently                 | Always                     |
| Conduct an initial assessment of fall risk                                                                         | <input type="checkbox"/> | <input type="checkbox"/> | <input type="checkbox"/> 0 | <input type="checkbox"/> 1 | <input type="checkbox"/> 2 | <input type="checkbox"/> 3 | <input type="checkbox"/> 4 |
| Reassess fall risk according to policy/procedure                                                                   | <input type="checkbox"/> | <input type="checkbox"/> | <input type="checkbox"/> 0 | <input type="checkbox"/> 1 | <input type="checkbox"/> 2 | <input type="checkbox"/> 3 | <input type="checkbox"/> 4 |
| Conduct post-fall huddles                                                                                          | <input type="checkbox"/> | <input type="checkbox"/> | <input type="checkbox"/> 0 | <input type="checkbox"/> 1 | <input type="checkbox"/> 2 | <input type="checkbox"/> 3 | <input type="checkbox"/> 4 |
| Communicate fall risk status to patients                                                                           | <input type="checkbox"/> | <input type="checkbox"/> | <input type="checkbox"/> 0 | <input type="checkbox"/> 1 | <input type="checkbox"/> 2 | <input type="checkbox"/> 3 | <input type="checkbox"/> 4 |
| Communicate fall risk status to families/informal caregivers                                                       | <input type="checkbox"/> | <input type="checkbox"/> | <input type="checkbox"/> 0 | <input type="checkbox"/> 1 | <input type="checkbox"/> 2 | <input type="checkbox"/> 3 | <input type="checkbox"/> 4 |
| Communicate fall risk status when patients are handed off across shifts                                            | <input type="checkbox"/> | <input type="checkbox"/> | <input type="checkbox"/> 0 | <input type="checkbox"/> 1 | <input type="checkbox"/> 2 | <input type="checkbox"/> 3 | <input type="checkbox"/> 4 |
| Communicate fall risk status when patients are handed off across units/departments                                 | <input type="checkbox"/> | <input type="checkbox"/> | <input type="checkbox"/> 0 | <input type="checkbox"/> 1 | <input type="checkbox"/> 2 | <input type="checkbox"/> 3 | <input type="checkbox"/> 4 |
| Direct patient care staff from multiple disciplines discuss a patient's risk of falls in the context of daily care | <input type="checkbox"/> | <input type="checkbox"/> | <input type="checkbox"/> 0 | <input type="checkbox"/> 1 | <input type="checkbox"/> 2 | <input type="checkbox"/> 3 | <input type="checkbox"/> 4 |

**VII. Outcomes of Fall Risk Reduction**

Maximum Score = 16

Please estimate the frequency in which your hospital staff reports the following fall events consistent with policy and procedures. Place a checkmark in the appropriate column. Please note, an assisted fall is defined as when a patient begins to fall and is assisted to the ground or other lower object by staff (not family or other visitor).

| Fall Events                                   | Frequency Reported         |                            |                            |                            |                            |
|-----------------------------------------------|----------------------------|----------------------------|----------------------------|----------------------------|----------------------------|
|                                               | Never                      | Rarely                     | Sometimes                  | Frequently                 | Always                     |
| Unassisted Falls that result in injury        | <input type="checkbox"/> 0 | <input type="checkbox"/> 1 | <input type="checkbox"/> 2 | <input type="checkbox"/> 3 | <input type="checkbox"/> 4 |
| Unassisted Falls that DO NOT result in injury | <input type="checkbox"/> 0 | <input type="checkbox"/> 1 | <input type="checkbox"/> 2 | <input type="checkbox"/> 3 | <input type="checkbox"/> 4 |
| Assisted Falls that result in injury          | <input type="checkbox"/> 0 | <input type="checkbox"/> 1 | <input type="checkbox"/> 2 | <input type="checkbox"/> 3 | <input type="checkbox"/> 4 |
| Assisted falls that DO NOT result in injury   | <input type="checkbox"/> 0 | <input type="checkbox"/> 1 | <input type="checkbox"/> 2 | <input type="checkbox"/> 3 | <input type="checkbox"/> 4 |
